# Supplementary material for: Multioxide combinatorial libraries: fusing synthetic approaches and additive technologies for highly orthogonal electronic noses
Source: Royal Society of Chemistry journal article supplement (doi:10.1039/d4lc00252k), 2024-01-01
Supplement: d4lc00252k1.pdf [file d4lc00252k1.pdf]

### Electronic Supplementary Information for

#### **Multioxide combinatorial libraries: fusing synthetic approaches and additive technologies for highly orthogonal electronic noses**

Vishalkumar Rajeshbhai Gohel<sup>a</sup>, Margarita Chetyrkina<sup>a</sup>, Andrey Gaev<sup>b</sup>, Nikolay P. Simonenko<sup>c</sup>, Tatiana L. Simonenko<sup>c</sup>, Philipp Yu. Gorobtsov<sup>c</sup>, Nikita A. Fisenko<sup>c</sup>, Darya A. Dudorova<sup>c</sup>, Valeriy Zaytsev<sup>a</sup>, Anna Lantsberg<sup>b</sup>, Elizaveta P. Simonenko<sup>c</sup>, Albert G. Nasibulin<sup>a</sup>, and Fedor S. Fedorov<sup>\*a</sup>

<sup>a</sup>Laboratory of Nanomaterials, Skolkovo Institute of Science and Technology, 3 Nobel Str., Moscow, 121205, Russian Federation. E-mail: [f.fedorov@skol.tech](mailto:f.fedorov@skol.tech)

<sup>b</sup>Bauman Moscow State Technical University, 5/1 Baumanskaya 2-ya Str., Moscow, 105005, Russian Federation.

<sup>c</sup>Kurnakov Institute of General and Inorganic Chemistry of the Russian Academy of Sciences, 31 Leninsky pr., Moscow, 119991, Russian Federation.

**Corresponding authors:** [f.fedorov@skol.tech](mailto:f.fedorov@skol.tech)

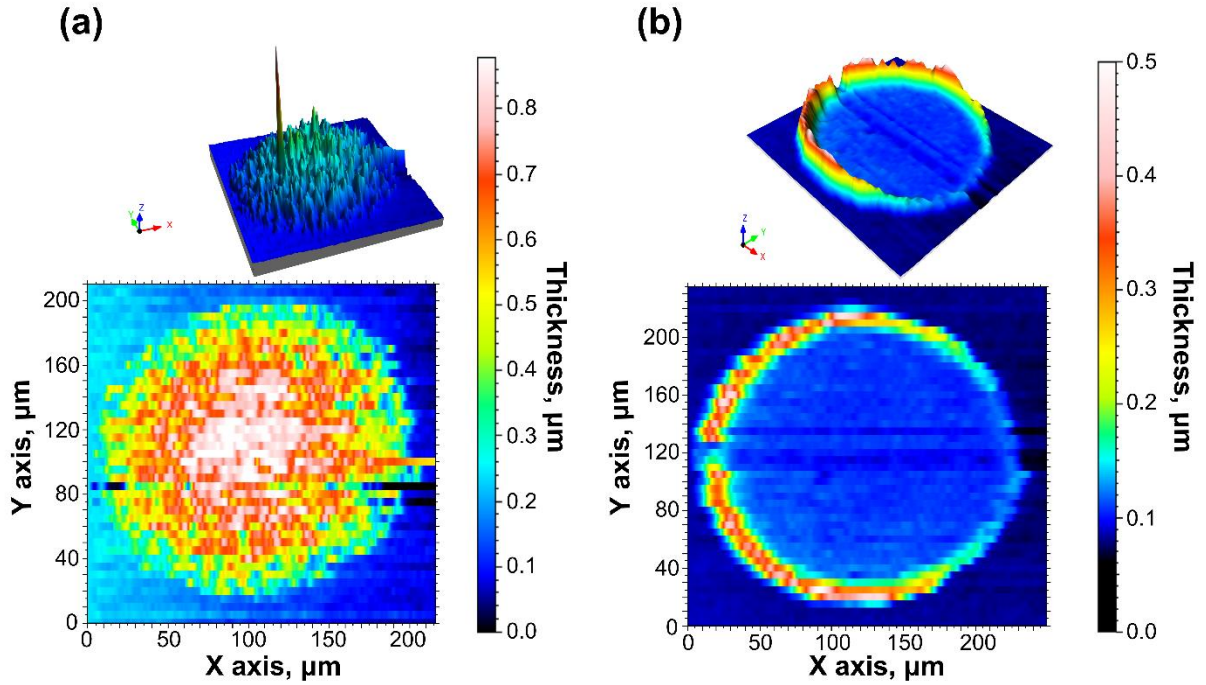

**Figure S1.** 3D mapping obtained by stylus profilometry for microplotted pixels of (a)  $\text{Co}_3\text{O}_4$  and (b) NiO #2 sensing materials.

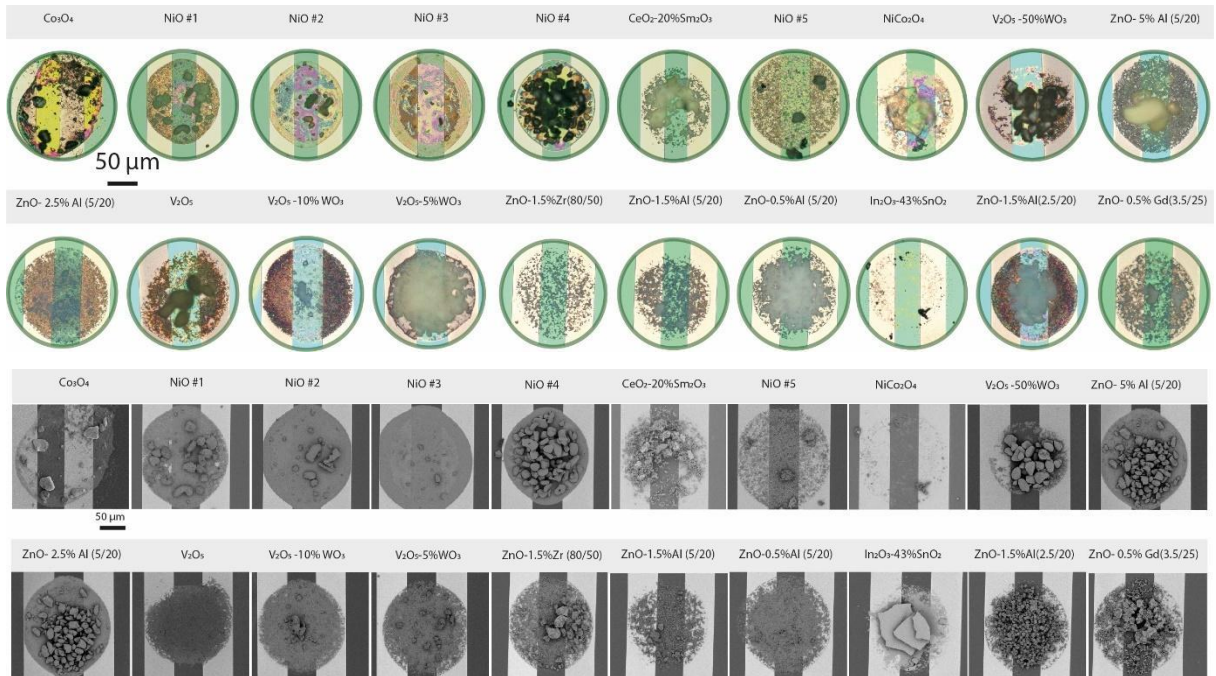

**Figure S2.** Optical and scanning electron microscopy images of all tested materials plotted on chips.

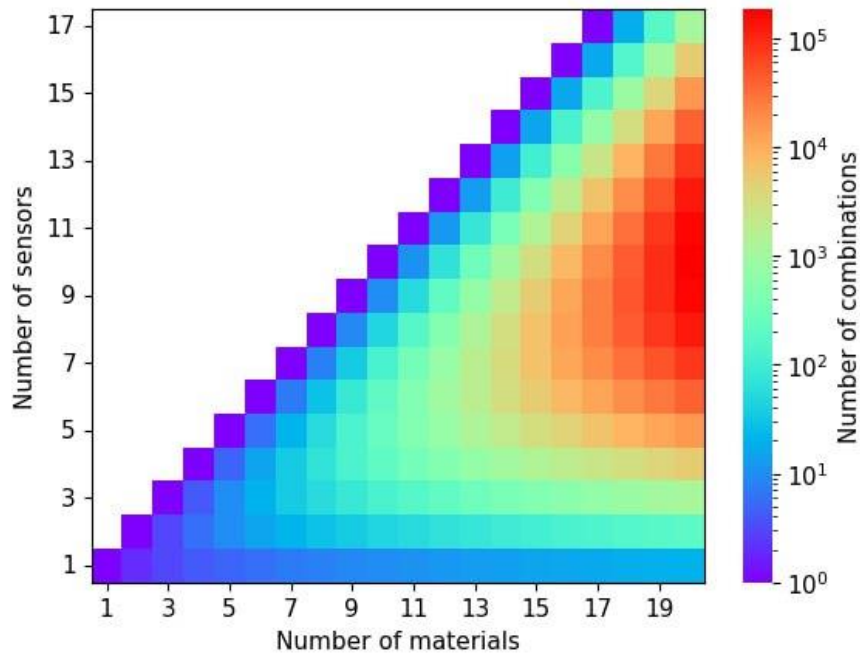

**Figure S3.** A number of combinations depending on the number of sensors *versus* the number of materials.

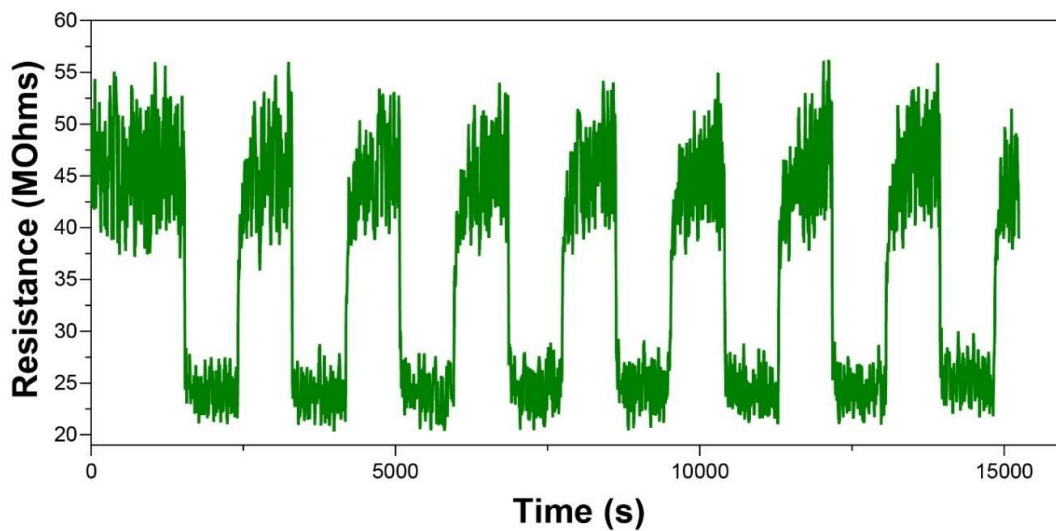

**Figure S4.** Representative resistance transient of  $\text{In}_2\text{O}_3$ -43% $\text{SnO}_2$  sensor over several sequential exposures towards ethanol, 2.6 ppm, in air. The moving average with the window size of 5 was applied to deal with the rather pronounced noise level indicated for this particular sample.

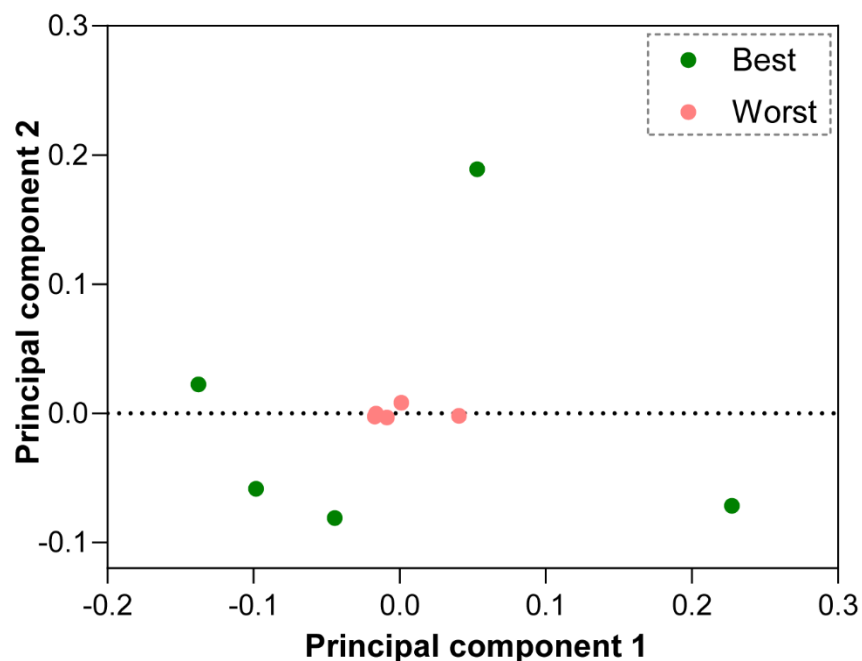

**Figure S5.** Representation of two-dimensional PCA transformation applied to the results from the “best” and the “worst” combinations of sensors across all the possible combinations from 3 to 20 sensors on a chip.

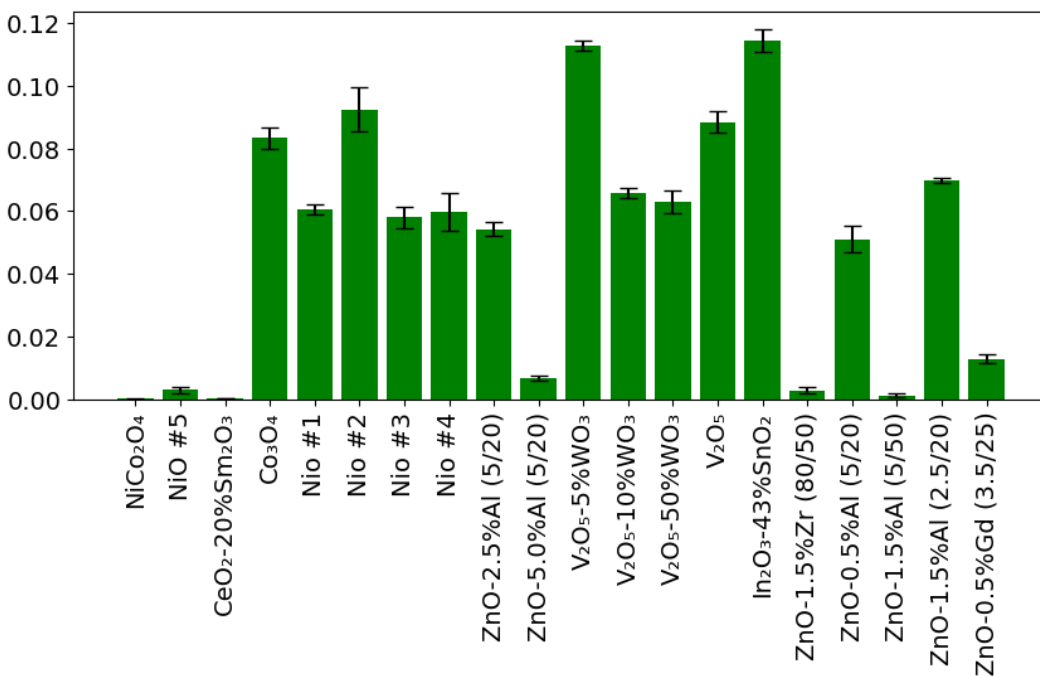

**Figure S6.** Feature importance of all the materials obtained using *Random Forest* classifier.

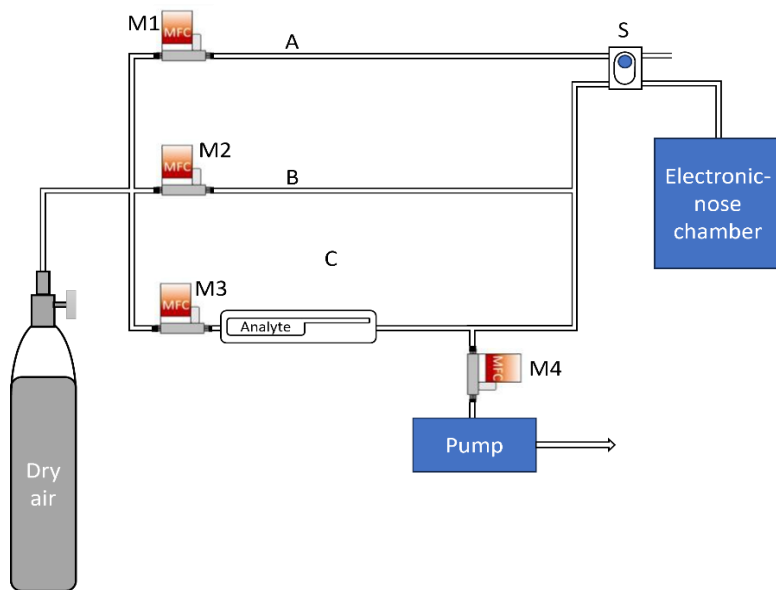

**Figure S7.** Gas analysis setup. M1, M2, M3, and M4 are mass flow controllers. A is the channel for the reference gas. B is the channel for the gas to control the concentration of the analyte. C is the channel for the concentration. S is the switch to toggle between the reference and the target gas. A pump is used to take out the excessive gas from the system.

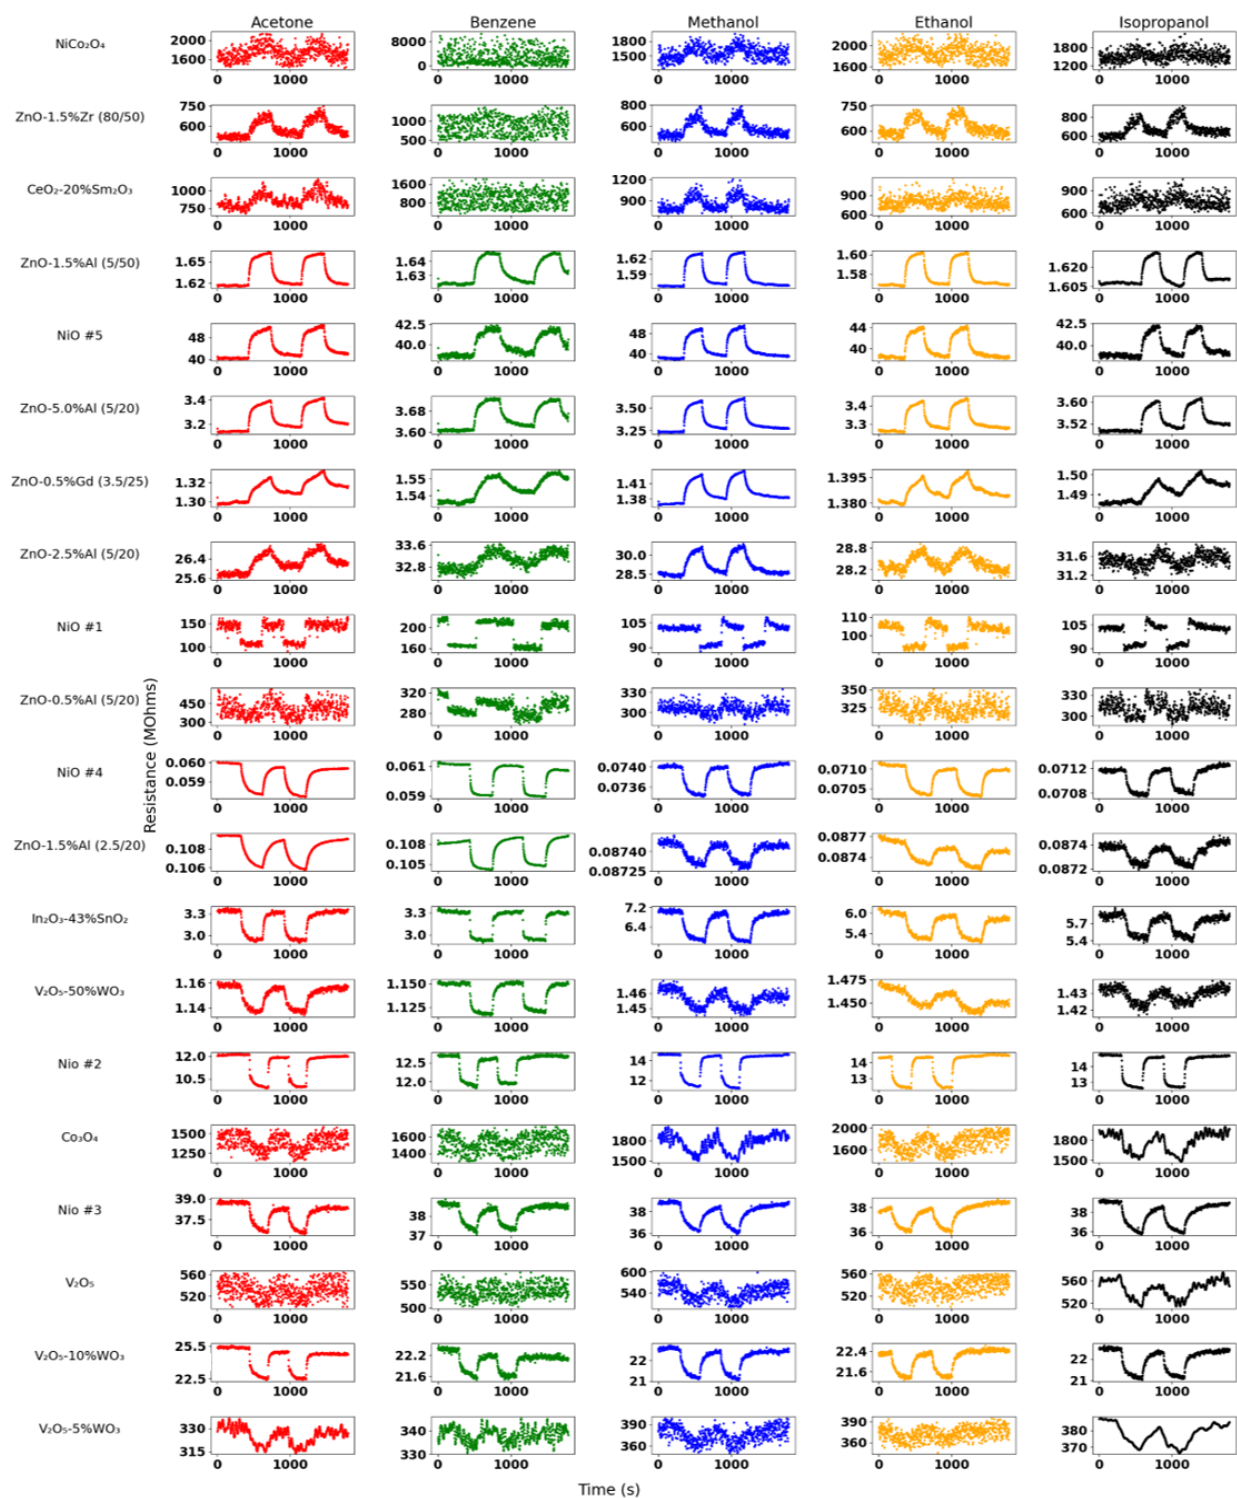

**Figure S8.** Resistance transients of the 20 materials towards the five analytes in dry air at 300 °C. The concentration of analyte is ca. 1 ppm in the mixture with air. The exposure to analytes was repeated two times, and the recovery time was adjusted depending on material performance.

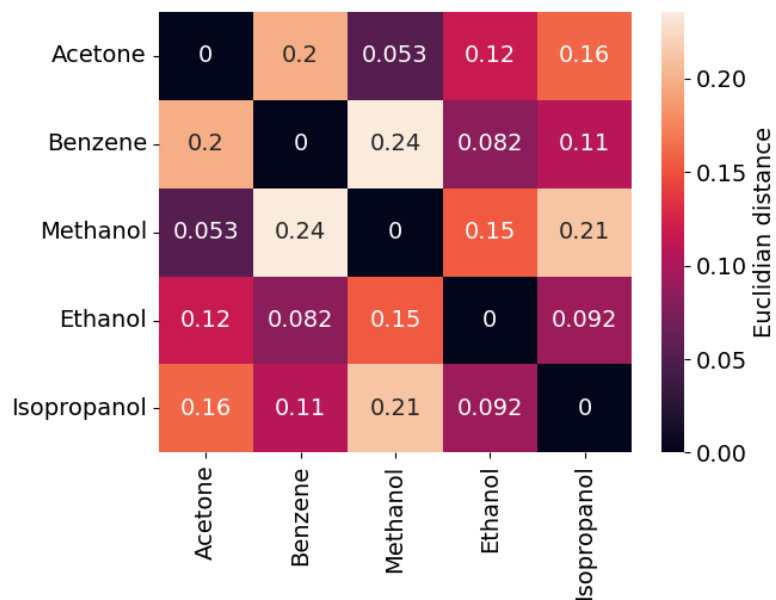

**Figure S9.** The distances between the clusters of analytes obtained from the “most important” materials.

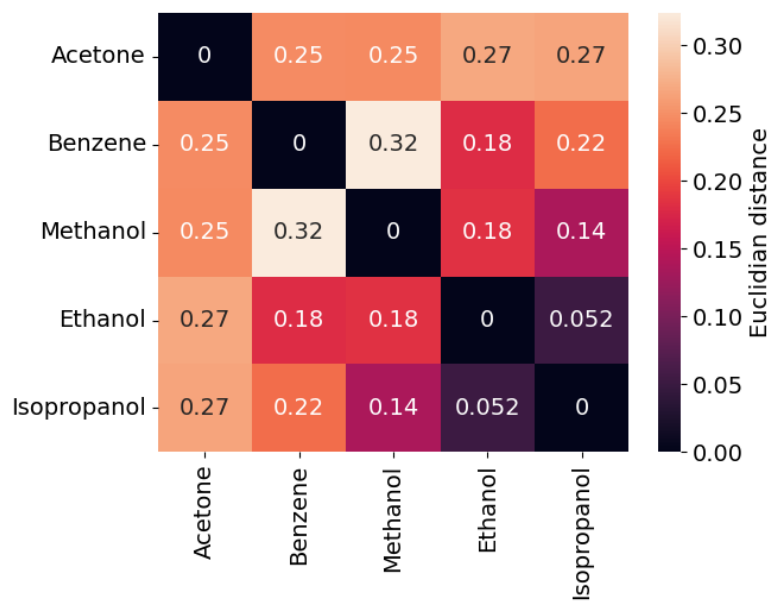

**Figure S10.** The distances between the clusters of analytes obtained from the “best” combination of materials.



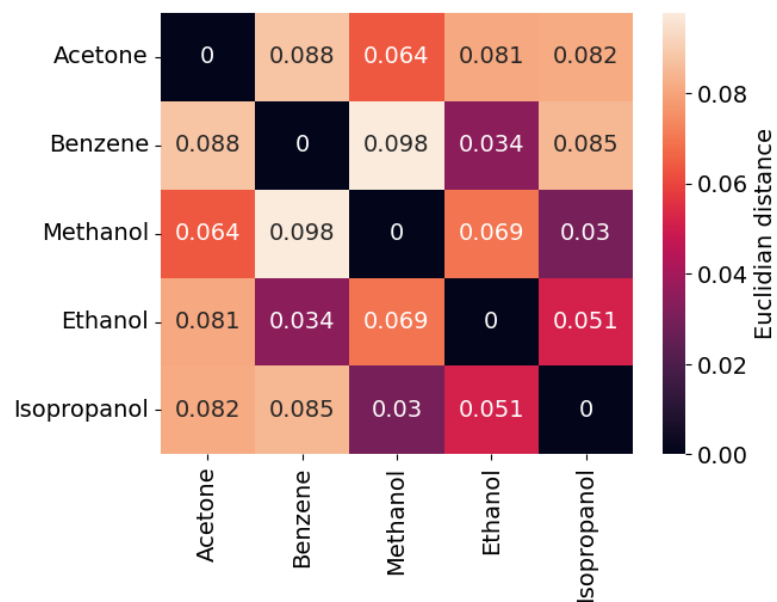

**Figure S11.** The distances between the clusters of analytes obtained from the “worst” combination of materials.



**Table S1.** The “best” and the “worst” combinations for specific analytes.

| analyte         | “best”          |                                                                                                                                                                                                                                                                                 | “worst”         |                                                                                                                                                                                                                                                         |
|-----------------|-----------------|---------------------------------------------------------------------------------------------------------------------------------------------------------------------------------------------------------------------------------------------------------------------------------|-----------------|---------------------------------------------------------------------------------------------------------------------------------------------------------------------------------------------------------------------------------------------------------|
|                 | median <i>M</i> | combination                                                                                                                                                                                                                                                                     | median <i>M</i> | combination                                                                                                                                                                                                                                             |
| acetone         | 0.29            | <b>NiO #1, NiO #4</b> , CeO <sub>2</sub> -20%Sm <sub>2</sub> O <sub>3</sub> , NiCo <sub>2</sub> O <sub>4</sub> , <b>V<sub>2</sub>O<sub>5</sub>-50%WO<sub>3</sub>, ZnO-5.0%Al (5/20), ZnO- 2.5%Al (5/20), V<sub>2</sub>O<sub>5</sub>-10%WO<sub>3</sub>, ZnO- 1.5%Al (2.5/20)</b> | 0.04            | Co <sub>3</sub> O <sub>4</sub> , <b>NiO #3, NiO #4, V<sub>2</sub>O<sub>5</sub>, V<sub>2</sub>O<sub>5</sub>- 5%WO<sub>3</sub>, ZnO-1.5%Al (2.5/20), ZnO-1.5%Al (5/50), ZnO- 0.5%Gd (3.5/25), ZnO- 0.5%Al (5/20)</b>                                      |
| benzene         | 0.32            | <b>NiO #2, NiO #5</b> , NiCo <sub>2</sub> O <sub>4</sub> , V <sub>2</sub> O <sub>5</sub> , ZnO-1.5%Zr (80/50), ZnO- 1.5%Al (2.5/20), In <sub>2</sub> O <sub>3</sub> - 43%SnO <sub>2</sub> , <b>ZnO-5.0%Al (5/20), ZnO- 2.5%Al (5/20)</b>                                        | 0.06            | Co <sub>3</sub> O <sub>4</sub> , <b>NiO #2, NiO #3, NiO #4, V<sub>2</sub>O<sub>5</sub>- 50%WO<sub>3</sub>, V<sub>2</sub>O<sub>5</sub>- 5%WO<sub>3</sub>, ZnO-1.5%Al (5/50), ZnO-0.5%Al (5/20), ZnO- 0.5%Gd (3.5/25)</b>                                 |
| methanol        | 0.29            | <b>NiO #1, NiO #2, NiO #4</b> , CeO <sub>2</sub> -20%Sm <sub>2</sub> O <sub>3</sub> , <b>NiO #5</b> , NiCo <sub>2</sub> O <sub>4</sub> , <b>V<sub>2</sub>O<sub>5</sub>-50%WO<sub>3</sub></b> , In <sub>2</sub> O <sub>3</sub> - 43%SnO <sub>2</sub> , ZnO-1.5%Zr (80/50)        | 0.04            | Co <sub>3</sub> O <sub>4</sub> , <b>NiO #3, V<sub>2</sub>O<sub>5</sub>, V<sub>2</sub>O<sub>5</sub>-10%WO<sub>3</sub>, V<sub>2</sub>O<sub>5</sub>-5%WO<sub>3</sub>, ZnO-1.5%Al (2.5/20), ZnO-1.5%Al (5/50), ZnO- 0.5%Gd (3.5/25), ZnO- 0.5%Al (5/20)</b> |
| ethanol         | 0.24            | <b>NiO #1, NiO #2, NiO #4</b> , CeO <sub>2</sub> - 20%Sm <sub>2</sub> O <sub>3</sub> , <b>NiO #5, ZnO-5.0%Al (5/20), ZnO- 2.5%Al (5/20)</b> , NiCo <sub>2</sub> O <sub>4</sub> , In <sub>2</sub> O <sub>3</sub> - 43%SnO <sub>2</sub>                                           | 0.04            | Co <sub>3</sub> O <sub>4</sub> , <b>NiO #3, V<sub>2</sub>O<sub>5</sub>, V<sub>2</sub>O<sub>5</sub>-10%WO<sub>3</sub>, V<sub>2</sub>O<sub>5</sub>-5%WO<sub>3</sub>, ZnO-1.5%Al (2.5/20), ZnO-1.5%Al (5/50), ZnO- 0.5%Gd (3.5/25), ZnO- 0.5%Al (5/20)</b> |
| isopropano<br>l | 0.29            | <b>NiO #1, NiO #2, NiO #4</b> , CeO <sub>2</sub> -20%Sm <sub>2</sub> O <sub>3</sub> , <b>NiO #5</b> , NiCo <sub>2</sub> O <sub>4</sub> #1, <b>V<sub>2</sub>O<sub>5</sub>-50%WO<sub>3</sub>, ZnO-2.5%Al (5/20)</b> , In <sub>2</sub> O <sub>3</sub> -43%SnO <sub>2</sub>         | 0.04            | Co <sub>3</sub> O <sub>4</sub> , <b>NiO #3, V<sub>2</sub>O<sub>5</sub>, V<sub>2</sub>O<sub>5</sub>-10%WO<sub>3</sub>, V<sub>2</sub>O<sub>5</sub>-5%WO<sub>3</sub>, ZnO-1.5%Al (2.5/20), ZnO-1.5%Al (5/50), ZnO- 0.5%Gd (3.5/25), ZnO- 0.5%Al (5/20)</b> |
